# Supplementary material
Source: HighWire-hosted journal article supplement (http://cmajopen.ca/highwire/filestream/81069/field_highwire_adjunct_files/2/original_submission.pdf)
Supplement: original_submission.pdf [file original_submission.pdf]

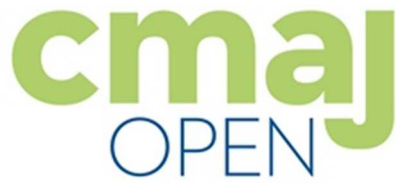

## The lesser of two evils? A qualitative study of quetiapine use by family physicians

|                               |                                                                                                                                                                                                                                                                                                                                                                                                                                                                                                                                                                                                                                                                                                                                                                                                                                                                                                                                                                                                                                                                                                                                                                                                                                                                                                                                                                                                                                                                                                                                                                                                                                                                                                                                                                                                                                                                                                         |
|-------------------------------|---------------------------------------------------------------------------------------------------------------------------------------------------------------------------------------------------------------------------------------------------------------------------------------------------------------------------------------------------------------------------------------------------------------------------------------------------------------------------------------------------------------------------------------------------------------------------------------------------------------------------------------------------------------------------------------------------------------------------------------------------------------------------------------------------------------------------------------------------------------------------------------------------------------------------------------------------------------------------------------------------------------------------------------------------------------------------------------------------------------------------------------------------------------------------------------------------------------------------------------------------------------------------------------------------------------------------------------------------------------------------------------------------------------------------------------------------------------------------------------------------------------------------------------------------------------------------------------------------------------------------------------------------------------------------------------------------------------------------------------------------------------------------------------------------------------------------------------------------------------------------------------------------------|
| Journal:                      | <i>CMAJ Open</i>                                                                                                                                                                                                                                                                                                                                                                                                                                                                                                                                                                                                                                                                                                                                                                                                                                                                                                                                                                                                                                                                                                                                                                                                                                                                                                                                                                                                                                                                                                                                                                                                                                                                                                                                                                                                                                                                                        |
| Manuscript ID                 | CMAJOpen-2017-0145                                                                                                                                                                                                                                                                                                                                                                                                                                                                                                                                                                                                                                                                                                                                                                                                                                                                                                                                                                                                                                                                                                                                                                                                                                                                                                                                                                                                                                                                                                                                                                                                                                                                                                                                                                                                                                                                                      |
| Manuscript Type:              | Qualitative                                                                                                                                                                                                                                                                                                                                                                                                                                                                                                                                                                                                                                                                                                                                                                                                                                                                                                                                                                                                                                                                                                                                                                                                                                                                                                                                                                                                                                                                                                                                                                                                                                                                                                                                                                                                                                                                                             |
| Date Submitted by the Author: | 03-Nov-2017                                                                                                                                                                                                                                                                                                                                                                                                                                                                                                                                                                                                                                                                                                                                                                                                                                                                                                                                                                                                                                                                                                                                                                                                                                                                                                                                                                                                                                                                                                                                                                                                                                                                                                                                                                                                                                                                                             |
| Complete List of Authors:     | Kelly, Martina ; University of Calgary, Department of Family Medicine<br>Dornan, Timothy; Centre for Medical Education, Medical and<br>Interprofessional Education<br>Pringsheim, Tamara; University of Calgary, Clinical Neurosciences                                                                                                                                                                                                                                                                                                                                                                                                                                                                                                                                                                                                                                                                                                                                                                                                                                                                                                                                                                                                                                                                                                                                                                                                                                                                                                                                                                                                                                                                                                                                                                                                                                                                 |
| Keywords:                     | Family medicine, general practice, primary care, Mental health, Qualitative research, Safety                                                                                                                                                                                                                                                                                                                                                                                                                                                                                                                                                                                                                                                                                                                                                                                                                                                                                                                                                                                                                                                                                                                                                                                                                                                                                                                                                                                                                                                                                                                                                                                                                                                                                                                                                                                                            |
| More Detailed Keywords:       |                                                                                                                                                                                                                                                                                                                                                                                                                                                                                                                                                                                                                                                                                                                                                                                                                                                                                                                                                                                                                                                                                                                                                                                                                                                                                                                                                                                                                                                                                                                                                                                                                                                                                                                                                                                                                                                                                                         |
| Abstract:                     | <p>Background: More than one in 10 Canadians received a prescription for quetiapine in 2012, often from family physicians, and usually off-label. Such high usage by generalists of a potent antipsychotic drug for non-standard indications requires explanation, particularly considering that quetiapine is no more effective for most indications than alternatives, causes neurological and metabolic harm, and is discouraged by opinion leaders. The aim of this research was to explore, in-depth, family physicians' reasons for this behavior.</p> <p>Methods: Qualitative interviews with fifteen urban family physicians in Alberta, Canada. Participants were purposively selected based on gender, years of experience, and practice type. Interviews explored participants' experiences prescribing quetiapine. Interviews were recorded, transcribed verbatim, and coded using thematic analysis.</p> <p>Results: A wish to support complex patients' day-to-day function without causing benzodiazepine addiction motivated participants to prescribe quetiapine. The indications were varied and, included incomplete symptom resolution, unclear or multiple mental health diagnoses, and complicated psychosocial problems. Family physicians benchmarked their prescribing against peers, whose prescriptions they were reluctant to stop. Limited knowledge of quetiapine's side effects led prescribers to choose low doses.</p> <p>Interpretation: Quetiapine helped family physicians treat patients with complex mental health problems without prescribing benzodiazepines. Using quetiapine off-label and in small doses, however, puts patients at risk for metabolic and neurological side effects. Guidelines focusing on a single diagnosis are unlikely to change prescribing patterns. Education about quetiapine should combine psychopharmacology with peer-led</p> |

1  
2  
3  
4  
5  
6  
7  
8  
9  
10  
11  
12  
13  
14  
15  
16  
17  
18  
19  
20  
21  
22  
23  
24  
25  
26  
27  
28  
29  
30  
31  
32  
33  
34  
35  
36  
37  
38  
39  
40  
41  
42  
43  
44  
45  
46  
47  
48  
49  
50  
51  
52  
53  
54  
55  
56  
57  
58  
59  
60

|  |                                                                                                                                        |
|--|----------------------------------------------------------------------------------------------------------------------------------------|
|  | educational initiatives, which focus on symptom resolution, co-morbidity and non-drug options to promote more appropriate prescribing. |
|  |                                                                                                                                        |

SCHOLARONE™  
Manuscripts

Confidential

## COREQ (CONsolidated criteria for REporting Qualitative research) Checklist

A checklist of items that should be included in reports of qualitative research. You must report the page number in your manuscript where you consider each of the items listed in this checklist. If you have not included this information, either revise your manuscript accordingly before submitting or note N/A.

| Topic                                          | Item No. | Guide Questions/Description                                                                                                                              | Reported on Page No. |
|------------------------------------------------|----------|----------------------------------------------------------------------------------------------------------------------------------------------------------|----------------------|
| <b>Domain 1: Research team and reflexivity</b> |          |                                                                                                                                                          |                      |
| <i>Personal characteristics</i>                |          |                                                                                                                                                          |                      |
| Interviewer/facilitator                        | 1        | Which author/s conducted the interview or focus group?                                                                                                   |                      |
| Credentials                                    | 2        | What were the researcher's credentials? E.g. PhD, MD                                                                                                     |                      |
| Occupation                                     | 3        | What was their occupation at the time of the study?                                                                                                      |                      |
| Gender                                         | 4        | Was the researcher male or female?                                                                                                                       |                      |
| Experience and training                        | 5        | What experience or training did the researcher have?                                                                                                     |                      |
| <i>Relationship with participants</i>          |          |                                                                                                                                                          |                      |
| Relationship established                       | 6        | Was a relationship established prior to study commencement?                                                                                              |                      |
| Participant knowledge of the interviewer       | 7        | What did the participants know about the researcher? e.g. personal goals, reasons for doing the research                                                 |                      |
| Interviewer characteristics                    | 8        | What characteristics were reported about the interviewer/facilitator? e.g. Bias, assumptions, reasons and interests in the research topic                |                      |
| <b>Domain 2: Study design</b>                  |          |                                                                                                                                                          |                      |
| <i>Theoretical framework</i>                   |          |                                                                                                                                                          |                      |
| Methodological orientation and Theory          | 9        | What methodological orientation was stated to underpin the study? e.g. grounded theory, discourse analysis, ethnography, phenomenology, content analysis |                      |
| <i>Participant selection</i>                   |          |                                                                                                                                                          |                      |
| Sampling                                       | 10       | How were participants selected? e.g. purposive, convenience, consecutive, snowball                                                                       |                      |
| Method of approach                             | 11       | How were participants approached? e.g. face-to-face, telephone, mail, email                                                                              |                      |
| Sample size                                    | 12       | How many participants were in the study?                                                                                                                 |                      |
| Non-participation                              | 13       | How many people refused to participate or dropped out? Reasons?                                                                                          |                      |
| <i>Setting</i>                                 |          |                                                                                                                                                          |                      |
| Setting of data collection                     | 14       | Where was the data collected? e.g. home, clinic, workplace                                                                                               |                      |
| Presence of non-participants                   | 15       | Was anyone else present besides the participants and researchers?                                                                                        |                      |
| Description of sample                          | 16       | What are the important characteristics of the sample? e.g. demographic data, date                                                                        |                      |
| <i>Data collection</i>                         |          |                                                                                                                                                          |                      |
| Interview guide                                | 17       | Were questions, prompts, guides provided by the authors? Was it pilot tested?                                                                            |                      |
| Repeat interviews                              | 18       | Were repeat interviews carried out? If yes, how many?                                                                                                    |                      |
| Audio/visual recording                         | 19       | Did the research use audio or visual recording to collect the data?                                                                                      |                      |
| Field notes                                    | 20       | Were field notes made during and/or after the interview or focus group?                                                                                  |                      |
| Duration                                       | 21       | What was the duration of the interviews or focus group?                                                                                                  |                      |
| Data saturation                                | 22       | Was data saturation discussed?                                                                                                                           |                      |
| Transcripts returned                           | 23       | Were transcripts returned to participants for comment and/or                                                                                             |                      |

| Topic                                  | Item No. | Guide Questions/Description                                                                                                        | Reported on Page No. |
|----------------------------------------|----------|------------------------------------------------------------------------------------------------------------------------------------|----------------------|
|                                        |          | correction?                                                                                                                        |                      |
| <b>Domain 3: analysis and findings</b> |          |                                                                                                                                    |                      |
| <i>Data analysis</i>                   |          |                                                                                                                                    |                      |
| Number of data coders                  | 24       | How many data coders coded the data?                                                                                               |                      |
| Description of the coding tree         | 25       | Did authors provide a description of the coding tree?                                                                              |                      |
| Derivation of themes                   | 26       | Were themes identified in advance or derived from the data?                                                                        |                      |
| Software                               | 27       | What software, if applicable, was used to manage the data?                                                                         |                      |
| Participant checking                   | 28       | Did participants provide feedback on the findings?                                                                                 |                      |
| <i>Reporting</i>                       |          |                                                                                                                                    |                      |
| Quotations presented                   | 29       | Were participant quotations presented to illustrate the themes/findings?<br>Was each quotation identified? e.g. participant number |                      |
| Data and findings consistent           | 30       | Was there consistency between the data presented and the findings?                                                                 |                      |
| Clarity of major themes                | 31       | Were major themes clearly presented in the findings?                                                                               |                      |
| Clarity of minor themes                | 32       | Is there a description of diverse cases or discussion of minor themes?                                                             |                      |

Developed from: Tong A, Sainsbury P, Craig J. Consolidated criteria for reporting qualitative research (COREQ): a 32-item checklist for interviews and focus groups. *International Journal for Quality in Health Care*. 2007. Volume 19, Number 6: pp. 349 – 357

**Once you have completed this checklist, please save a copy and upload it as part of your submission. DO NOT include this checklist as part of the main manuscript document. It must be uploaded as a separate file.**

## The lesser of two evils? A qualitative study of quetiapine use by family physicians

Martina Kelly, MBBCh, MA, Tim Dornan, MD, PhD, Tamara Pringsheim MD, MSc

Martina Kelly is associate professor, Department of Family Medicine, Cumming School of Medicine, University of Calgary, Calgary, Alberta, Canada. [makelly@ucalgary.ca](mailto:makelly@ucalgary.ca)

Tim Dornan is professor, School of Medicine, Dentistry and Biomedical Sciences, Queen's University, Belfast, Northern Ireland. [timothy.dornan@gmail.com](mailto:timothy.dornan@gmail.com)

Tamara Pringsheim is associate professor Department of Clinical Neurosciences, Psychiatry, Pediatrics and Community Health Sciences, Cumming School of Medicine, University of Calgary, Calgary, Alberta, Canada. [tmprings@ucalgary.ca](mailto:tmprings@ucalgary.ca)

Corresponding author: Martina Kelly, G329, Undergraduate Family Medicine, Cumming School of Medicine, Health Sciences Centre, 3330 Hospital Drive, Calgary, Alberta T2N 2N1 [makelly@ucalgary.ca](mailto:makelly@ucalgary.ca)  
00 1 403 210 6318

Funded by: Alberta Mental Health Strategic Clinical Network, Alberta, Canada

The authors have no competing interests

Word count: 2519/2500

Tables = 2, Figure = 1, Appendices = 2

## Abstract

**Background:** More than one in 10 Canadians received a prescription for quetiapine in 2012, often from family physicians, and usually off-label. Such high usage by generalists of a potent antipsychotic drug for non-standard indications requires explanation, particularly considering that quetiapine is no more effective for most indications than alternatives, causes neurological and metabolic harm, and is discouraged by opinion leaders. The aim of this research was to explore, in-depth, family physicians' reasons for this behavior.

**Methods:** Qualitative interviews with fifteen urban family physicians in Alberta, Canada. Participants were purposively selected based on gender, years of experience, and practice type. Interviews explored participants' experiences prescribing quetiapine. Interviews were recorded, transcribed verbatim, and coded using thematic analysis.

**Results:** A wish to support complex patients' day-to-day function without causing benzodiazepine addiction motivated participants to prescribe quetiapine. The indications were varied and, included incomplete symptom resolution, unclear or multiple mental health diagnoses, and complicated psychosocial problems. Family physicians benchmarked their prescribing against peers, whose prescriptions they were reluctant to stop. Limited knowledge of quetiapine's side effects led prescribers to choose low doses.

**Interpretation:** Quetiapine helped family physicians treat patients with complex mental health problems without prescribing benzodiazepines. Using quetiapine off-label and in small doses, however, puts patients at risk for metabolic and neurological side effects. Guidelines focusing on a single diagnosis

1  
2  
3 are unlikely to change prescribing patterns. Education about quetiapine should combine  
4  
5 psychopharmacology with peer-led educational initiatives, which focus on symptom resolution, co-  
6  
7 morbidity and non-drug options to promote more appropriate prescribing.  
8  
9

10  
11  
12 **Key words:** family physicians, quetiapine, prescribing, qualitative research  
13  
14

## 15 16 Introduction

17  
18  
19 Quetiapine is the most widely prescribed antipsychotic in North America, costing billions of dollars per  
20  
21 year.<sup>1</sup> Most of the twelve quetiapine prescriptions per 100 Canadian citizens per year are written by  
22  
23 family physicians.<sup>2,3</sup> Although quetiapine is licensed for treatment of schizophrenia, bipolar disorder,  
24  
25 and as an adjunctive to antidepressants in moderate to severe depression, much prescribing of  
26  
27 quetiapine by family physicians is off-label.<sup>4,5</sup> Insomnia, anxiety and behavioral disturbance in elderly  
28  
29 people and children, are common reasons for off-label use.<sup>4,6,7</sup> Evidence of benefit for these indications  
30  
31 is disputed.<sup>4,8,9</sup> Metabolic, neurological, and cardiovascular side effects<sup>8,10</sup> pose a significant risk of  
32  
33 harm<sup>10,11</sup>, as they do with other anti-psychotics, and drugs that are as effective and safer are available.<sup>12-</sup>  
34  
35  
36  
37 <sup>14</sup> For those reasons, professional bodies caution physicians to use antipsychotics judiciously.<sup>15-17</sup> The  
38  
39 Choosing Wisely campaign made four recommendations for restricting the use of second generation  
40  
41 antipsychotics, including quetiapine. And a number of guidelines on deprescribing antipsychotics have  
42  
43 recently been published.<sup>18,19</sup> Yet physicians prescribe quetiapine when there are good reasons for not  
44  
45 doing so.  
46  
47  
48  
49

50  
51 Decisions to prescribe are not simply a matter of knowing the indications for drugs. These are influenced  
52  
53 by characteristics of patients,<sup>20</sup> practitioners,<sup>21,22,23,24</sup> the organizational settings in which physicians  
54  
55 work,<sup>25,26</sup> commercial influences,<sup>23,27</sup> and interactions between those various factors. Continuing  
56  
57  
58  
59  
60

1  
2  
3 professional development is a means of influencing prescribing behavior but this calls for a clear  
4  
5 understanding of the complex web of factors that cause questionable behaviors to exist and persist. The  
6  
7 exploratory nature of qualitative research is well suited to scratching below the surface of non-ideal  
8  
9 behaviors and identifying obstacles and facilitators to the adoption of desired behaviors. We therefore  
10  
11 set out to explore, in depth, why and how family physicians prescribed quetiapine.  
12  
13  
14  
15  
16

## 17 Methods

18  
19  
20 This qualitative interview study was set in urban family practice in Alberta, Canada. The researchers  
21  
22 were a family physician (MK), a specialist physician with an interest in pharmacoepidemiology and  
23  
24 mental health (TP), and a senior physician education researcher (TD). All have experience of conducting  
25  
26 qualitative research.  
27  
28  
29

30 **Sampling and Recruitment:** Study information comprising an introductory email, cover letter, and  
31  
32 informed consent, were disseminated via faculty email lists (Department of Family Medicine, University  
33  
34 of Calgary). We constructed a sampling frame to obtain a purposive sample by gender, years of  
35  
36 experience, and practice type. We contacted volunteers by telephone to give more information, answer  
37  
38 questions, ensure anonymity, and arrange an interview. Sampling in the later stages was influenced,  
39  
40 also, by the findings of interim analysis.  
41  
42  
43

44 **Data collection:** To minimize any social desirability bias that might result from group interaction and  
45  
46 ensure physicians felt comfortable providing in-depth descriptions of their prescribing practices, we  
47  
48 chose one-to-one interviews to collect data. MK or TP conducted interviews in person (12 interviews) or  
49  
50 by telephone (2 interviews), for which they offered participants an honorarium. A semi-structured  
51  
52 interview schedule was developed, piloted, and amended (see Appendix A). The interview opened by  
53  
54 asking participants to describe their clinical practice and general approach to patients presenting with  
55  
56  
57  
58  
59  
60



1  
2  
3 mental health concerns. Following this, participants described their experiences of prescribing  
4  
5  
6  
7  
8  
9  
10  
11  
12  
13  
14  
15  
16  
17  
18  
19  
20  
21  
22  
23  
24  
25  
26  
27  
28  
29  
30  
31  
32  
33  
34  
35  
36  
37  
38  
39  
40  
41  
42  
43  
44  
45  
46  
47  
48  
49  
50  
51  
52  
53  
54  
55  
56  
57  
58  
59  
60

mental health concerns. Following this, participants described their experiences of prescribing  
quetiapine. We followed up on issues they raised and asked additional questions about patterns of  
quetiapine use, resources, prescribing influences, and patient factors.

**Analysis:** Data collection and analysis were iterative and used to inform ongoing sampling and interview  
modification. Interviews were recorded, transcribed and coded, using template analysis. This is a flexible  
form of thematic analysis<sup>28</sup> in which an initial template was devised based on a priori codes developed  
from the literature. This was modified in response to open coding of transcripts. Transcripts were read  
independently, and initial codes identified. MK and TP met to discuss and refine the preliminary  
template. We then applied the template to further data and refined it progressively until we had arrived  
at a final template. To prevent the findings being unduly influenced by our individual preconceptions,  
we discussed our responses to the data and recorded field notes after each meeting to capture our  
different perspectives as generalist and specialist physician respectively. A senior physician, experienced  
in qualitative prescribing research (TD) gave us additional help to respond reflexively to the data by  
discussing and challenging the interpretation, during the initial phase of analysis, mid-way, and at its  
final stage. Analysis continued until we felt we had a comprehensive understanding of family physicians'  
use of quetiapine, which indicated our sample was sufficient.<sup>29</sup>

**Ethics:** This study received approval from the Conjoint Health Research Ethics Board (CHREB), University  
of Calgary.

## Results

**Participants:** Fifteen physicians (8 men, 7 women) participated. Interviews lasted 29-66 minutes  
(average 40 minutes) and were conducted in locations determined by participants, which included their  
practices, homes, coffee shops, or the researchers' offices. Twelve participants worked as family  
physicians in the community and three were family physicians working part-time (1) or full-time (2) as

1  
2  
3 hospitalists. Four participants worked in clinics designed to support patients with complex psychosocial  
4 needs such as chronic mental illness, low income, unemployment, and homelessness. Table 1 details  
5 participants' years of experience and types of practice. Most participants worked in extended primary  
6 care teams, which included behavioral health consultants (13 interviewees), social workers (6  
7 interviewees), and joint physician-psychologist appointments (3 interviewees).  
8  
9  
10  
11  
12  
13  
14  
15

16 Our final template, which details themes and subthemes that summarize participants' use of quetiapine,  
17 is shown in Table 2. This narrative elaborates those themes. Further exemplar quotations are provided  
18 in Appendix B. Participants were torn between feeling responsible for relieving patients' symptoms so  
19 they could function in society, and giving them benzodiazepines to which they might become addicted.  
20  
21  
22  
23  
24  
25  
26  
27  
28  
29  
30  
31  
32  
33  
34  
35  
36  
37  
38  
39  
40  
41  
42  
43  
44  
45  
46  
47  
48  
49  
50  
51  
52  
53  
54  
55  
56  
57  
58  
59  
60

Quetiapine seemed to balance efficacy against safety (Figure 1).

### Mental health plus – a solution for complex patients?

Participants did not see quetiapine as a first line treatment for depression, anxiety, behavioral disorders,  
or insomnia. They reserved it for patients unresponsive to first line therapies, patients with multiple  
psychiatric diagnoses, or patients with challenging psychological or social histories. Quetiapine was able  
to 'calm', 'take the edge off', or 'settle' agitated or distressed patients. One physician described this as  
'*mental health plus*'. The decision to use quetiapine was based on physicians' belief that it relieved  
distressing symptoms and helped patients retain some semblance of normality – be it to remain in work,  
take care of their families, or keep their hostel bed.

So most of us family docs are used to using zopiclone for sleep and so the reason I think, I think  
I'm seeing so much quetiapine is because there's another psychiatric aspect to what they're  
seeing, so it's not just sleep....There's either an anxiety component, an agitation component,  
there's something else. It's sleep plus. (Interview 2, L 177-180)

1  
2  
3 I would see patients who I guess were primarily coming out of jail and a lot of those patients  
4 would be on quetiapine for aggressive behavior, for sleep, for anxiety, and some of them would  
5 even say, some of those patients would say that it helped them sort of quell their addictions, so  
6 that's probably where I got exposed to it the most. (Interview 7, L103-108)  
7  
8  
9

### 12 Choosing cautiously – the lesser of two evils

13  
14  
15 Participants selected quetiapine because of its non-addictive nature and they felt it was less likely to be  
16 abused. They wanted to avoid benzodiazepines, so quetiapine was 'the lesser of two evils' (IV 4, L468).  
17  
18

19  
20 You need to stay away as much as possible from benzodiazepines or zopiclone or anything in  
21 that class because of the addictive properties and, well dependence really, and the interference  
22 with sleep architecture. Now admittedly, I don't fully understand how quetiapine either  
23 augments or disrupts sleep architecture so that I don't know. I don't know anything about the  
24 long-term effects but as a result of us needing to move away from benzos, etc., it seems like  
25 quetiapine has moved into that vacuum that was created. (Interview 5, L126-131)  
26  
27  
28  
29  
30  
31  
32

33  
34 Participants were unfamiliar with quetiapine's mechanism of action and knew variable amounts about  
35 its adverse effects. Most believed it was a reasonably safe option and were comfortable to prescribe it  
36 at a dose of 25 to 50 mg per day. Since they thought this was safe, they did not monitor patients for  
37 adverse effects.  
38  
39  
40  
41  
42

43  
44 They seem to do fine so I'm not very worried about 50 or 100 [milligrams]. (Interview 10, L 457)  
45

46  
47 Well I'm embarrassed to admit, I'm not even sure about the relationship between quetiapine  
48 and diabetes so if they've had some blood tests, I check and see what their blood sugar is, and  
49 obviously take a look at their weight, but I don't routinely check a blood sugar after they've  
50 been on it for a while. (Interview 10, L274-276)  
51  
52  
53  
54  
55  
56  
57  
58  
59  
60

1  
2  
3 Few participants informed patients that quetiapine was an antipsychotic and, if they did, couched it as  
4  
5 'not being used for that' and emphasized that the dose was low.  
6  
7

## 8 Prescribing influences 9

10 Other physicians, such as psychiatrists, colleagues in family medicine, and preceptors were the people  
11  
12 who most often guided participants towards using quetiapine. Participants did not identify messaging  
13  
14 from pharmaceutical companies or demand from patients as significant prescribing influences.  
15  
16  
17

18 If I were to hazard a guess, it would be, if it's becoming more popular, that it would be just  
19  
20 something that you're seeing your colleagues using and you're seeing specialists using so you  
21  
22 tend to use it a bit more. (Interview 12, L 544-546)  
23  
24

25 Caring for patients on quetiapine initiated by another physician created dilemmas. Participants usually  
26  
27 continued prescriptions initiated in hospital, particularly if started by a psychiatrist, although they did  
28  
29 not always know who had started it, or why. When another family physician had started quetiapine,  
30  
31 participants did not routinely re-evaluate its use before renewing the prescription. Some participants  
32  
33 said patients were reluctant to stop quetiapine and, since it had seemed to provide therapeutic benefit,  
34  
35 chose to continue it.  
36  
37  
38

39 I've renewed it in patients who have had it for awhile and they're stable on their medications, I  
40  
41 certainly renew it, though when I do, I ask why they're taking the medication and often times  
42  
43 they don't really know why they're on it. (Interview 6, L 124-126)  
44  
45  
46

## 47 Discussion 48

### 49 Main results 50

51 Family physicians' quetiapine prescribing was much less paradoxical, at the level of the individual  
52  
53 physician and patient, than evidence at an epidemiological level could ever suggest. Physician and  
54  
55  
56  
57  
58  
59  
60

1  
2  
3 patient were between the rock of mental ill-health, which first line medications had not relieved, and  
4 the hard place of benzodiazepine addiction. Participants perceived low dose quetiapine as relatively  
5 safe, effective, and they were under the impression that fellow family physicians and psychiatrists  
6 thought the same. Widespread prescribing of quetiapine for off-label indications could too easily give  
7 the impression of indiscriminate use. Participants in this research felt they prescribed quetiapine  
8 carefully, taking account of patients' symptoms, and social situations. Their knowledge however, of the  
9 mechanism of action of quetiapine, its side-effects and the need for monitoring was poor. This  
10 knowledge gap contributed to the preferential use of quetiapine over other drugs, and likely a failure to  
11 recognize and properly attribute quetiapine induced adverse effects to the drug.  
12  
13  
14  
15  
16  
17  
18  
19  
20  
21  
22

### 23 Related studies

24  
25 These findings resonate with previous prescribing studies which indicate that physicians' prescribing  
26 decisions are strongly impacted by personal experience,<sup>21, 23, 24</sup> social influences and healthcare  
27 systems.<sup>22, 30</sup> The role of social factors influencing the implementation of Choosing Wisely  
28 recommendations and in particular, prescribing recommendations, is supported in a recent survey of  
29 family physicians and primary care workers in the US.<sup>20</sup> Notably, the recommendations health care  
30 workers felt would be the most problematic related to caring for symptomatic patients, because of  
31 potential negative impact on the doctor-patient relationship. In our study, family physicians negotiated  
32 use of quetiapine – to address the patient's immediate symptoms, while building rapport with a view to  
33 developing long-term management strategies.  
34  
35  
36  
37  
38  
39  
40  
41  
42  
43  
44

45 A key benefit identified by our participants was the calming effect of quetiapine. Family physicians  
46 perceived quetiapine as a safe and effective alternative to potentially addictive medication.<sup>1</sup> Quetiapine  
47 appeared to fill the niche previously occupied by benzodiazepines.<sup>31</sup> Yet our participants' knowledge of  
48 the mechanism of action of quetiapine and safety concerns was limited – despite recent educational  
49 campaigns<sup>16, 17</sup>. Family physicians mitigated this gap, through use of low doses and, in keeping with  
50  
51  
52  
53  
54  
55  
56  
57  
58  
59  
60

1  
2  
3 previous literature on guideline use<sup>32,33</sup>, prioritized real world experience by colleagues, both peers and  
4  
5 specialists over information.  
6  
7  
8  
9

### 10 *Strengths and limitations*

11  
12 One strength is use of qualitative methods to explore family physicians' experiences with quetiapine.  
13  
14 This allowed family physicians to detail their use of quetiapine, which enabled us to investigate what  
15  
16 they said they did, rather than their opinions of what they should do. Their frankness and willingness to  
17  
18 admit ignorance gave us confidence in the validity of their accounts of their practices. Our  
19  
20 complementary perspectives of family physician and specialist helped us both understand and challenge  
21  
22 each other during the analysis. Further, we gauged the trustworthiness of our findings by presenting  
23  
24 them at meetings of family physicians and sending them to participants as a form of member checking.  
25  
26  
27  
28 This is an exploratory study, our sample consisted of physicians from a single urban centre. We  
29  
30 continued interviewing until we had reached sufficiency and analyzed our data until we had a good  
31  
32 understanding of our dataset. Although four of our participants worked with vulnerable populations, all  
33  
34 of our participants described quetiapine use for complex patients. Whilst our study design was in line  
35  
36 with qualitative research practice, a more exhaustive sample size might have added extra insights.  
37  
38  
39  
40

### 41 *Implications*

42  
43 One implication of this study is that guidelines targeting a single diagnosis may have limited applicability  
44  
45 to the cohort of patients most likely to be prescribed quetiapine. For many patients, psychoeducation,  
46  
47 talking therapies and SSRIs had already been tried. Guidance that helps family physicians tease out  
48  
49 symptoms in relation to specific diagnosis, recognizes coexisting illness, and focuses on effective second  
50  
51 or even third line management options may be more helpful. While family physicians awareness of the  
52  
53 need to avoid medications with addictive potential is laudable, there is a risk that this single message,  
54  
55  
56  
57  
58  
59  
60

1  
2  
3 may lead to physicians making inappropriate choices. There is a clear need for increased awareness of  
4 safety and monitoring of patients on quetiapine, yet disseminating information on its own is likely to be  
5 insufficient. Rather peer-led educational sessions using complex cases, which challenge family  
6 physicians to explore alternatives, may be more beneficial. Cases that incorporate multi-morbidity and  
7 social complexity could act as a useful springboard for reflection to explore appropriate therapeutic  
8 alternatives. Better communication about medication choices between physicians, and between  
9 physicians and patients, could promote more judicious prescribing of quetiapine. There was an  
10 assumption among hospitalists, family physicians and psychiatrists that patients were prescribed  
11 quetiapine for clear indications, but these were poorly communicated. Hospital doctors expected family  
12 doctors to know when to stop quetiapine yet the latter were reluctant to discontinue psychotropic  
13 medications for fear of causing mental distress or relapses. Clearer instructions on drug reconciliation  
14 discharge summaries could address this. There is also a need for better involvement of patients when  
15 making prescribing decisions. Should family physicians decide to prescribe quetiapine off-label, this  
16 should be in partnership with patients, to include baseline assessment and ongoing monitoring.<sup>34</sup>  
17  
18 Further research is needed to understand, why, with resources in hand, physicians felt pressure to  
19 choose between the 'lesser of two evils', both of which were classes of drugs.  
20  
21  
22  
23  
24  
25  
26  
27  
28  
29  
30  
31  
32  
33  
34  
35  
36  
37  
38  
39  
40  
41  
42  
43  
44  
45  
46  
47  
48  
49  
50  
51  
52  
53  
54  
55  
56  
57  
58  
59  
60

## References

1. Kuehn BM. Questionable antipsychotic prescribing remains common, despite serious risks. *Jama*. 2010;303(16):1582-4.
2. Monasterio E, McKean A. Quetiapine use: Science or clever marketing? *Australian and New Zealand Journal of Psychiatry*. 2012:0004867412455234.
3. Pringsheim T, Gardner DM. Dispensed prescriptions for quetiapine and other second-generation antipsychotics in Canada from 2005 to 2012: a descriptive study. *CMAJ Open*. 2014;2(4):E225-E32.
4. Maglione M, Maher AR, Hu J, Wang Z, Shanman R, Shekelle PG, et al. Off-label use of atypical antipsychotics: an update 2011, *Comparative Effectiveness Reviews No.43*. Agency for Health Research and Quality (US). 2011.
5. Marston L, Nazareth I, Petersen I, Walters K, Osborn DP. Prescribing of antipsychotics in UK primary care: a cohort study. *BMJ Open*. 2014;4(12):e006135.
6. Duncan D, Cooke L, Symonds C, Gardner D, Pringsheim T. Quetiapine use in adults in the community: a population-based study in Alberta, Canada. *BMJ open*. 2016;6(3):e010861.
7. McKean A, Monasterio E. Off-label use of atypical antipsychotics. *CNS drugs*. 2012;26(5):383-90.
8. Carney AC. Efficacy of quetiapine off-label uses: data synthesis. *Journal of psychosocial nursing and mental health services*. 2013;51(8):11-8.
9. Walton SM, Schumock GT, Lee KV, Alexander GC, Meltzer D, Stafford RS. Prioritizing Future Research on Off-Label Prescribing: Results of a Quantitative Evaluation. *Pharmacotherapy: The Journal of Human Pharmacology and Drug Therapy*. 2008;28(12):1443-52.
10. Muench J, Hamer AM. Adverse effects of antipsychotic medications. *American family physician*. 2010;81(5):617-22.
11. Katzman MA, Bleau P, Blier P, Chokka P, Kjernisted K, Van Ameringen M. Canadian clinical practice guidelines for the management of anxiety, posttraumatic stress and obsessive-compulsive disorders. *BMC Psychiatry*. 2014;14(1):S1.
12. Depping AM, Komossa K, Kissling W, Leucht S. Second-generation antipsychotics for anxiety disorders 2010. *The Cochrane Library* [Internet]. 2010. Available from: <http://onlinelibrary.wiley.com/doi/10.1002/14651858.CD008120.pub2/full>. [Accessed April 26, 2017].
13. Sultzer DL, Davis SM, Tariot PN, Dagerman KS, Lebowitz BD, Lyketsos CG, et al. Clinical symptom responses to atypical antipsychotic medications in Alzheimer's disease: phase 1 outcomes from the CATIE-AD effectiveness trial. *American Journal of Psychiatry*. 2008;165(7):844-54.
14. Zheng L, Mack WJ, Dagerman KS, Hsiao JK, Lebowitz BD, Lyketsos CG, et al. Metabolic changes associated with second-generation antipsychotic use in Alzheimer's disease patients: the CATIE-AD study. *American Journal of Psychiatry*. 2009;166(5):583-90.
15. American Diabetes Association. Consensus development conference on antipsychotic drugs and obesity and diabetes. *Diabetes Care*. 2004;27(2):596-601.
16. Reus VI, Fochtmann LJ, Eyler AE, Hilty DM, Horvitz-Lennon M, Jibson MD, et al. The American Psychiatric Association practice guideline on the use of antipsychotics to treat agitation or psychosis in patients with dementia. *American Journal of Psychiatry*. 2016;173(5):543-6.
17. Workgroup ACW. American Geriatrics Society identifies another five things that healthcare providers and patients should question. *J Am Geriatr Soc*. 2014;62(5):950-60.
18. Evidence-based deprescribing algorithm for antipsychotics. Ontario Pharmacy Evidence Network [Internet]. n.d. Available from: <http://www.open-pharmacy-research.ca/evidence-based-deprescribing-algorithm-for-antipsychotics/>. [Accessed September 1, 2017].
19. Tanni P, Dunbabin D. A Guide to Deprescribing Antipsychotics. Consultant Pharmacy Services [Internet]. 2016. Available from:



1  
2  
3 <https://www.primaryhealthtas.com.au/sites/default/files/A%20Guide%20to%20Deprescribing%20Antipsychotics.pdf>. [Accessed September 1, 2017].

- 4  
5 20. Zikmund-Fisher BJ, Kullgren JT, Fagerlin A, Klamerus ML, Bernstein SJ, Kerr EA. Perceived barriers  
6 to implementing individual Choosing Wisely® recommendations in two national surveys of primary care  
7 providers. *Journal of general internal medicine*. 2017;32(2):210-7.
- 8 21. Watkins C, Harvey I, Carthy P, Moore L, Robinson E, Brawn R. Attitudes and behaviour of general  
9 practitioners and their prescribing costs: a national cross sectional survey. *Quality and Safety in Health  
10 Care*. 2003;12(1):29-34.
- 11 22. Hajjaj FM, Salek MS, Basra MK, Finlay AY. Non-clinical influences on clinical decision-making: a  
12 major challenge to evidence-based practice. *Journal of the Royal Society of Medicine*. 2010;103(5):178-  
13 87.
- 14 23. Jones MI, Greenfield SM, Bradley CP. Prescribing new drugs: qualitative study of influences on  
15 consultants and general practitioners. *Bmj*. 2001;323(7309):378.
- 16 24. Armstrong D, Reyburn H, Jones R. A study of general practitioners' reasons for changing their  
17 prescribing behaviour. *Bmj*. 1996;312(7036):949-52.
- 18 25. Rodrigues AT, Roque F, Falcão A, Figueiras A, Herdeiro MT. Understanding physician antibiotic  
19 prescribing behaviour: a systematic review of qualitative studies. *International Journal of Antimicrobial  
20 Agents*. 2013;41(3):203-12.
- 21 26. Rich EC. *Barriers to Choosing Wisely® in Primary Care: It's Not Just About "the Money"*. Springer;  
22 2017.
- 23 27. Spurling GK, Mansfield PR, Montgomery BD, Lexchin J, Doust J, Othman N, et al. Information  
24 from pharmaceutical companies and the quality, quantity, and cost of physicians' prescribing: a  
25 systematic review. *PLOS Medicine*. 2010;7(10):e1000352.
- 26 28. King N, Cassell C, Symon G. Using templates in the thematic analysis of text. *Essential Guide to  
27 Qualitative Methods in Organizational Research*. 2004;2:256-70.
- 28 29. Varpio L, Ajjawi R, Monrouxe LV, O'Brien BC, Rees CE. Shedding the cobra effect: problematising  
29 thematic emergence, triangulation, saturation and member checking. *Medical Education*. 2017;51(1):40-  
30 50.
- 31 30. Sketris IS, Langille Ingram E, Lummis HL. Strategic opportunities for effective optimal prescribing  
32 and medication management. *Can J Clin Pharmacol*. 2009;16(1):e103-25.
- 33 31. Brett J. Concerns about quetiapine. *Australian prescriber*. 2015;38(3):95.
- 34 32. Hayward RS, Guyatt GH, Moore K, McKibbin A, Carter AO. Canadian physicians' attitudes about  
35 and preferences regarding clinical practice guidelines. *Canadian Medical Association Journal*.  
36 1997;156(12):1715-23.
- 37 33. Soumerai SB, McLaughlin TJ, Avorn J. Improving drug prescribing in primary care: a critical  
38 analysis of the experimental literature. *The Milbank Quarterly*. 2005;83(4).
- 39 34. Gardner DM, Teehan MD. *Antipsychotics and their side effects*: Cambridge University Press;  
40 2010.
- 41  
42  
43  
44  
45  
46  
47  
48  
49  
50  
51  
52  
53  
54  
55  
56  
57  
58  
59  
60

Table 1. Participants

| <b>Gender</b> | <b>Experience (years)</b> | <b>Practice type</b>                                                        |
|---------------|---------------------------|-----------------------------------------------------------------------------|
| M             | < 5                       | Full-time community practice                                                |
| M             | 5-9                       | Comprehensive care to vulnerable populations                                |
| M             | 5-9                       | Locum, sessional work at walk-in clinics                                    |
| F             | 5-9                       | Sessional work, walk-in clinic                                              |
| F             | 5-9                       | Part-time hospitalist, part-time community practice                         |
| M             | 10-14                     | Full-time hospitalist                                                       |
| M             | 10-14                     | Comprehensive care to vulnerable populations                                |
| F             | 10-14                     | Part-time hospitalist, part-time community practice                         |
| F             | 10-14                     | Full-time community practice                                                |
| M             | >15                       | Full time community practice, resident preceptor                            |
| M             | >15                       | Full-time community practice, resident preceptor, interest in mental health |
| M             | >15                       | Part-time community practice in aboriginal health                           |
| F             | >15                       | Community practice                                                          |
| F             | >15                       | Full-time community practice with an interest in integrative care           |
| F             | >15                       | Full time community practice, with an interest in eating disorders          |

**Table 2. Themes and subthemes describing family physicians use of quetiapine**

| <b>Main theme</b>                              | <b>Subtheme</b>                         | <b>Codes</b>                                                                                                                                                   |
|------------------------------------------------|-----------------------------------------|----------------------------------------------------------------------------------------------------------------------------------------------------------------|
| 1. Mental health plus                          | 1.1 General use – it takes the edge off | 1.1.1 Psychosis<br>1.1.2 Depression<br>1.1.3 Anxiety<br>1.1.4 Behavioural disorders<br>1.1.5 Insomnia/sleep disturbances                                       |
|                                                | 1.2 Complex Conditions of Use           | 1.2.1 Patients who are unresponsive to first line therapy<br>1.2.2 Patients with multiple/unclear psychiatric diagnoses or psychological and social complexity |
| 2. Choose cautiously – the lesser of two evils | 2.1 Avoid addictive medication          | 2.1.1 Avoiding benzodiazepines<br>2.2.1 Less harmful than alternatives                                                                                         |
| 3. My patients are fine on low doses           |                                         | 3.1.1 Use of low dose<br>3.1.2 Side-effects<br>3.1.3 Monitoring                                                                                                |
| 4. Prescribing influences                      |                                         | 4.1 Learning in general<br>4.2 Learning through peers<br>4.3 Learning with psychiatrist<br>4.4 Pharma not perceived as an influence                            |

1  
2  
3  
4  
5 **Appendix A. Interview Guide**  
6

| Main Topic Area                           | Specific Approach                                                                                                                                                                                                                                                                                                                                                                                                                                                                                                                                                                                                                                                                                                                                                                                  |
|-------------------------------------------|----------------------------------------------------------------------------------------------------------------------------------------------------------------------------------------------------------------------------------------------------------------------------------------------------------------------------------------------------------------------------------------------------------------------------------------------------------------------------------------------------------------------------------------------------------------------------------------------------------------------------------------------------------------------------------------------------------------------------------------------------------------------------------------------------|
| Interview set up                          | Greeting, safe environment, study overview, purpose, consent and anonymity issues and express thanks.                                                                                                                                                                                                                                                                                                                                                                                                                                                                                                                                                                                                                                                                                              |
| Lead in<br>(general exploratory question) | Can you tell me a little bit about the number and types of mental health patients you see in your practice?                                                                                                                                                                                                                                                                                                                                                                                                                                                                                                                                                                                                                                                                                        |
| Focus on prescribing                      | What are your tendencies when it comes to prescribing medication? If you can, walk me through your thought processes. <i>(Probe gently, this is a sensitive area)</i>                                                                                                                                                                                                                                                                                                                                                                                                                                                                                                                                                                                                                              |
| Focus on quetiapine                       | <p>In the last few years, quetiapine, has been used by some family physicians. Have you prescribed quetiapine for any of your patients?</p> <p>Probes:</p> <ul style="list-style-type: none"> <li>- Can you give me some examples? (e.g. condition, if continuation, initiation)</li> <li>- What has been your experience of using quetiapine? <i>(ask for details, repeated examples)</i></li> </ul> <p>In what situations would you consider quetiapine the drug of choice, or alternatively, the drug to avoid of in this patient population?</p> <p>Probes:</p> <ol style="list-style-type: none"> <li>a. How do you follow up patients on quetiapine...specifics</li> <li>b. Can you describe how you have come to use quetiapine? (influences – probes – patient request, pharma)</li> </ol> |
| Wrap up                                   | Anything you'd like to add?                                                                                                                                                                                                                                                                                                                                                                                                                                                                                                                                                                                                                                                                                                                                                                        |
|                                           | Thank you and end interview                                                                                                                                                                                                                                                                                                                                                                                                                                                                                                                                                                                                                                                                                                                                                                        |

1  
2  
3  
4  
5  
6  
7  
8  
9  
10  
11  
12  
13  
14  
15  
16  
17  
18  
19  
20  
21  
22  
23  
24  
25  
26  
27  
28  
29  
30  
31  
32  
33  
34  
35  
36  
37  
38  
39  
40  
41  
42  
43  
44  
45  
46  
47  
48  
49  
50  
51  
52  
53  
54  
55  
56  
57  
58  
59  
60

Confidential

1  
2  
3  
4  
5  
6  
7  
8  
9  
10  
11  
12  
13  
14  
15  
16  
17  
18  
19  
20  
21  
22  
23  
24  
25  
26  
27  
28  
29  
30  
31  
32  
33  
34  
35  
36  
37  
38  
39  
40  
41  
42  
43  
44  
45  
46  
47

Figure 1. Influences that promote off-label use of quetiapine

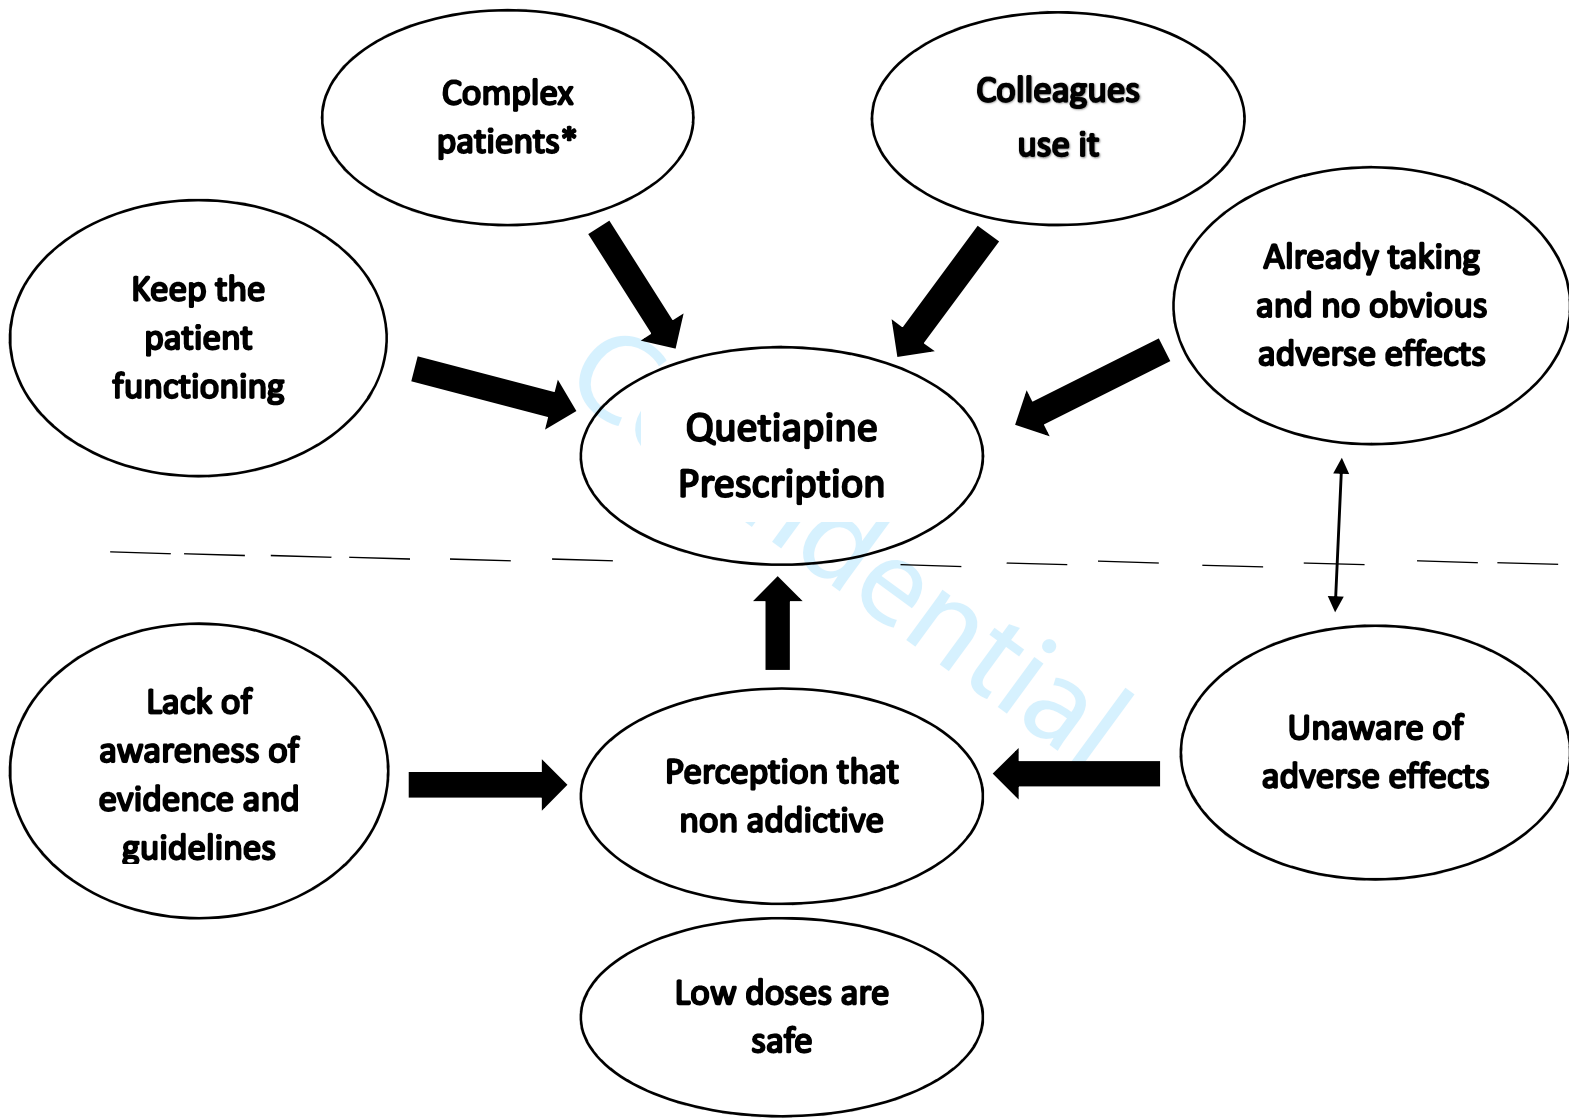

\*Complex patients have incomplete symptom resolution on a single agent, have multiple mental health diagnosis and may also live in unstable environments

1  
2  
3 **Appendix B: Additional quotes to illustrate themes and subthemes**  
4

5 IV=interview

| Main theme           | Subtheme                                | Additional quotes                                                                                                                                                                                                                                                                                                                                                                                                                                                                                                                                                                                                                                                                                                                                                                       |
|----------------------|-----------------------------------------|-----------------------------------------------------------------------------------------------------------------------------------------------------------------------------------------------------------------------------------------------------------------------------------------------------------------------------------------------------------------------------------------------------------------------------------------------------------------------------------------------------------------------------------------------------------------------------------------------------------------------------------------------------------------------------------------------------------------------------------------------------------------------------------------|
| 1.Mental health plus | 1.1 General use – it takes the edge off | <p>Mhm, so to me the most common reason for using quetiapine would be as a sedative...(IV4, L244)</p> <p>So its definitely, it's not kind of my standard approach to somebody with anxiety..... I mean I obviously have a bit of a concern that I'm using it, you know, sort of off-label. I mean it's not been prescribed as a sleep aid. (IV 7, L257-8)</p> <p>...it really helps. I'm not too sure how it works but it does. (IV 11, L772)</p> <p>So I mean most of the reason in any situation that I've used quetiapine has been to like take advantage of the sedative properties, so situations where you kind of want that benefit and possibly, you know, any other, I don't know, people just seem to find it calming. (IV 15, L357-60)</p>                                   |
|                      | 1.2 Complex Conditions of Use           | <p><i>1.2.1 Patients who are unresponsive to first line therapy</i></p> <p>The niche for me is that patient with depression who still has issues either with some, any depressive symptoms that are lingering... That depressed patient maybe who still ruminates a lot at night and, therefore, they have a hard time going to sleep and it's related to kind of their mind not shutting down, and I've seen it work quite nicely for that. (IV 9, L 142-147)</p> <p>So I usually start with an antidepressant and if there is, if there's still a fair bit of anxiety or agitation or sleep disturbance, that's when I will often add quetiapine. (IV 10, L88-90)</p> <p><i>1.2.2 Patients with multiple/unclear psychiatric diagnoses or psychological and social complexity</i></p> |

6  
7  
8  
9  
10  
11  
12  
13  
14  
15  
16  
17  
18  
19  
20  
21  
22  
23  
24  
25  
26  
27  
28  
29  
30  
31  
32  
33  
34  
35  
36  
37  
38  
39  
40  
41  
42  
43  
44  
45  
46  
47

1  
2  
3  
4  
5  
6  
7  
8  
9  
10  
11  
12  
13  
14  
15  
16  
17  
18  
19  
20  
21  
22  
23  
24  
25  
26  
27  
28  
29  
30  
31  
32  
33  
34  
35  
36  
37  
38  
39  
40  
41  
42  
43  
44  
45  
46  
47

|                                                        |                                            |                                                                                                                                                                                                                                                                                                                                                                                                                                                                                                                                                                                                                                                                                                                                                                                                                                                                                                                                                                                                                                                                                                                                                                                                                                                        |
|--------------------------------------------------------|--------------------------------------------|--------------------------------------------------------------------------------------------------------------------------------------------------------------------------------------------------------------------------------------------------------------------------------------------------------------------------------------------------------------------------------------------------------------------------------------------------------------------------------------------------------------------------------------------------------------------------------------------------------------------------------------------------------------------------------------------------------------------------------------------------------------------------------------------------------------------------------------------------------------------------------------------------------------------------------------------------------------------------------------------------------------------------------------------------------------------------------------------------------------------------------------------------------------------------------------------------------------------------------------------------------|
|                                                        |                                            | <p>Yeah, then I got the borderline personality sometimes. They don't react to the simple SSRIs so I mix them with a low dose of quetiapine. (IV 11, L320-21)</p> <p>Mhm, so a patient comes in with, so middle-aged patient, either female or male coming in with predominantly generalized anxiety, some depressive features, some insomnia, who is suffering most acutely from the insomnia and the fatigue as a result which then ends up fueling the anxiety and depressive symptoms, so would then start at a low dose concurrently an antidepressant in addition to very low dose, say 12.5 mg, of quetiapine at night just to help with the sleep initiation. (IV 5, L75-79)</p> <p>[regarding use for insomnia] On the other hand, that's one complaint that I think we struggle with addressing because you just don't have a lot of options that actually are reliably effective and don't come with a host of other problems, so there's certainly been times where I think we've prescribed quetiapine just as a sleeping aid simply because we don't want to prescribe anything else and the encounter is not going to end, you know, we sort of have to give up a prescription for that in order to meet other goals. (IV 8, L76-85)</p> |
| <p>2. Choosing cautiously, the lesser of two evils</p> | <p>Need to avoid addictive medications</p> | <p>No. No, I think because there's not any alternatives, right? It's sort of like what do you do with somebody who's got a personality disorder, has impulsivity, has addictions, has anger management problems, and you don't want to put them on a benzodiazepine, right? Like there's not a lot of other options. IV 7, L548-550)</p> <p>Okay, I don't want an addictive medication, I don't want to get them on a Z-drug, I don't think the trazodone is going to, to get to the dose I would need, I don't think it's really what they're after. What else is not addictive that might be kind of conking them out a little bit and maybe have the side effect of helping with their anxiety and that's where I come to quetiapine. (IV 14, L234-237)</p>                                                                                                                                                                                                                                                                                                                                                                                                                                                                                         |
| <p>3. My patients seem fine on low doses</p>           | <p>3.1 Low doses are OK</p>                | <p>I certainly have some concerns but at small doses, and I guess I don't know that this is technically correct, but I think of it as being at small doses, the most common concerns with quetiapine are quite mitigated, so like, you know, the weight gain, the metabolic syndrome, diabetes would all be, I think not as significant on the small doses. (IV 13, L258-266)</p>                                                                                                                                                                                                                                                                                                                                                                                                                                                                                                                                                                                                                                                                                                                                                                                                                                                                      |



|  |                |                                                                                                                                                                                                                                                                                                                                                                                                                                                                                                                                                                                                                                                                                                                                                                                                                                                                                                                                                                                                                                                                                                                                                                                                                                                                                                                                                                                                                                                                                                                                                                                                                                                                                                                                                                                                                                                                                                                                                                                                                                                                                                                                                                                                                                            |
|--|----------------|--------------------------------------------------------------------------------------------------------------------------------------------------------------------------------------------------------------------------------------------------------------------------------------------------------------------------------------------------------------------------------------------------------------------------------------------------------------------------------------------------------------------------------------------------------------------------------------------------------------------------------------------------------------------------------------------------------------------------------------------------------------------------------------------------------------------------------------------------------------------------------------------------------------------------------------------------------------------------------------------------------------------------------------------------------------------------------------------------------------------------------------------------------------------------------------------------------------------------------------------------------------------------------------------------------------------------------------------------------------------------------------------------------------------------------------------------------------------------------------------------------------------------------------------------------------------------------------------------------------------------------------------------------------------------------------------------------------------------------------------------------------------------------------------------------------------------------------------------------------------------------------------------------------------------------------------------------------------------------------------------------------------------------------------------------------------------------------------------------------------------------------------------------------------------------------------------------------------------------------------|
|  |                | <p>Ah yes, oh, oh yeah, totally forgot about that whole side of things. Yes, we do worry about weight gain and diabetes and all of that stuff with quetiapine but that's more for the patients that are on the higher doses, like if they're on 12.5, not as worried. (IV 2, L565-568)</p>                                                                                                                                                                                                                                                                                                                                                                                                                                                                                                                                                                                                                                                                                                                                                                                                                                                                                                                                                                                                                                                                                                                                                                                                                                                                                                                                                                                                                                                                                                                                                                                                                                                                                                                                                                                                                                                                                                                                                 |
|  | 3.2 Monitoring | <p>I don't think I have a set schedule, it might depend on age, other risk factors, availability, what else? And how much they're on, so I mean if the patient is on a low dose, I'll probably be aware, okay, when did I last check? Okay, a couple of years ago, that's fine. Um, somebody who maybe has a lot of, who I know has got some risk factors and maybe they're on a high dose of it and they're going to be on it for the foreseeable future because they have a chronic illness that's not getting better, they might need to be screened annually and checked regularly that way. (IV 8, L269-275)</p> <p>Okay, so I've never gone into very higher doses, so the dose that I typically use is 25-50 mg at night. I will tell patients that it can be quite sedating but that's okay, taking it in the evening. The other, I usually won't titrate it up. I think I will just start at 25 and then go to 50, not any kind of slow titration. I will advise patients that it can, and I must admit I can't remember off the top of my head whether at that dose it can but it can have metabolic effects on things like weight, lipids and glucose. (IV 9, L 106-110)</p> <p>Uh, so I don't routinely like monitor in terms of, you know, like CBC every 3 months, looking to see if their white count is down, something, I don't but I guess I do give it a thought and again, more in, if I see people who are like on higher doses of it, and I don't see actually that many of those people, but I would be doing things like checking their cholesterol or like making sure it's been checked and same with like diabetes screening but I don't have like a hard and fast, you know, like every 3 months. I mean that would be overkill for those things and yeah, I don't do regular like, yeah like liver, like ALT monitoring or anything like that. (IV 13, L 323-329)</p> <p>No, you know, when I was in the hospital, I would do ECGs and I suppose that if somebody would be on a bigger dose of quetiapine, I would, you know, definitely probably do an ECG every year or something like that. If there was a big dose change, I would consider that but honestly, I haven't seen many people recently to</p> |

1  
2  
3  
4  
5  
6  
7  
8  
9  
10  
11  
12  
13  
14  
15  
16  
17  
18  
19  
20  
21  
22  
23  
24  
25  
26  
27  
28  
29  
30  
31  
32  
33  
34  
35  
36  
37  
38  
39  
40  
41  
42  
43  
44  
45  
46  
47

|                          |                                       |                                                                                                                                                                                                                                                                                                                                                                                                                                                                                                                                                                                                                                                                                                                                                                                                                                                                                                                                                                                                                                                                                                                                                                                                                                                                                                                                                                                                                                                                                                                                                                                                                                                                                                                                                                                                                                                                                       |
|--------------------------|---------------------------------------|---------------------------------------------------------------------------------------------------------------------------------------------------------------------------------------------------------------------------------------------------------------------------------------------------------------------------------------------------------------------------------------------------------------------------------------------------------------------------------------------------------------------------------------------------------------------------------------------------------------------------------------------------------------------------------------------------------------------------------------------------------------------------------------------------------------------------------------------------------------------------------------------------------------------------------------------------------------------------------------------------------------------------------------------------------------------------------------------------------------------------------------------------------------------------------------------------------------------------------------------------------------------------------------------------------------------------------------------------------------------------------------------------------------------------------------------------------------------------------------------------------------------------------------------------------------------------------------------------------------------------------------------------------------------------------------------------------------------------------------------------------------------------------------------------------------------------------------------------------------------------------------|
|                          |                                       | <p>think about but yeah, I would probably do, again, the metabolic stuff, you know, cholesterol and liver if somebody was on it for a long time. (IV 6, L 393-396)</p> <p>And I think if I were using larger doses, the few that I've used it in tend to be younger people and people who I'm not concerned about metabolic effects, at least for the short term. I think I would monitor things like weight and lipids and glucose if they were somebody who had issues with those problems. (IV 9, L 127-9)</p>                                                                                                                                                                                                                                                                                                                                                                                                                                                                                                                                                                                                                                                                                                                                                                                                                                                                                                                                                                                                                                                                                                                                                                                                                                                                                                                                                                     |
| 4.Prescribing influences | Role models (psychiatrists and peers) | <p>I don't actually know how I ended up prescribing quetiapine. Like I really don't remember going to an in-service on this is a great thing to add or, it kind of slipped in and I think it was, I think I was grasping at straws and not sure what else to try and I figured, okay, this patient population is probably a pretty safe thing to try, it's a pretty safe thing to stop, um, just give it a go and I think that, in my case, that's how I ended up doing it. (IV 14, L473-477)</p> <p>I think it does, I mean because there's a lot of, you know, when you get a patient like mine sent back from the specialist on this, there's definitely an impulse just to continue that treatment unless there's clearly a problem with it. If you see that happening repeatedly, there may be an increasing drive to, especially if you've had a message that this medicine works for this and you see that the specialists are doing it, that's certainly reinforcing a tendency to actually do that prescription. (IV 8, L 352-356)</p> <p>Um, so prescribing is, I would say, informed by clinical practice guidelines in addition to any CME, be it through journals or conferences but more so by practice of peers and practice of specialists, so again because of my mix of clinical work both in the hospital and within a primary care clinic that has access to specialists who also provide consultation in house, it's through those interactions, you know, with the inpatient psychiatrists as well as the consulting psychiatrists in our community practice that color or inform how I prescribe. (IV 5, L 26-31)</p> <p>Because we're taught that. We're taught that by the psychiatrists. Add a little quetiapine, add a little, you know, before it was the T3, you know, it's like yeah, yeah, but now it's add a little quetiapine. (IV 1, L 553-556)</p> |

|  |                                                              |                                                                                                                                                                                                                                                                                                                                                                                                                                                                                                                                                                                                                                                                                                                                                                                                                                                                                                                                                                                                                                                                                                                                                                                                                                                                                                                                                                                                                                                                                                                                                                                                                  |
|--|--------------------------------------------------------------|------------------------------------------------------------------------------------------------------------------------------------------------------------------------------------------------------------------------------------------------------------------------------------------------------------------------------------------------------------------------------------------------------------------------------------------------------------------------------------------------------------------------------------------------------------------------------------------------------------------------------------------------------------------------------------------------------------------------------------------------------------------------------------------------------------------------------------------------------------------------------------------------------------------------------------------------------------------------------------------------------------------------------------------------------------------------------------------------------------------------------------------------------------------------------------------------------------------------------------------------------------------------------------------------------------------------------------------------------------------------------------------------------------------------------------------------------------------------------------------------------------------------------------------------------------------------------------------------------------------|
|  |                                                              | <p>Usually psychiatrists in quetiapine's case, so you just get lots of consults back where they're using quetiapine for various reasons in people who aren't psychotic which, I mean in my view, would be sort of that sort of, was its primary indication when it came out, I think the depression and the bipolar are sort of secondary. (IV 7, L 341-345)</p> <p>In my residency program when we did our psychiatry, the psychiatrists were using it a fair amount and so it's just, you kind of got familiar with it and with quetiapine, especially like it, I don't know, for some reason I was always less scared about it than like risperidone or the other atypical antipsychotics and we were kind of taught, you know, olanzapine causes a ton of metabolic issues but low doses of quetiapine, again, I don't know if this is correct but might not have the same effect so. (IV 15, L 653-658)</p>                                                                                                                                                                                                                                                                                                                                                                                                                                                                                                                                                                                                                                                                                                 |
|  | <p>Initiating versus continuing quetiapine prescriptions</p> | <p>She was being treated by a psychiatrist who has now transferred the care back to me but without me having, I sort of see the patient before getting any information from the psychiatrist and they're on a prescription for, among other things, quetiapine, so then I'm stuck in that position of okay, do I continue this medication? I haven't had a chance to really assess this patient. They report, oh yeah, I'm doing much better than I was. How much of that is due to that, and that particular patient was actually quite young as well so she's actually probably younger than the quetiapine has an official indication for any kind of antidepressant effect. She's still a teenager where there's sort of warnings about, so she's now on an SSRI and an antipsychotic, and a benzodiazepine and kind of leaves me, you know, sort of pressured to continue all of those medications but I actually still haven't got, I have received an initial assessment from the psychiatrist. I haven't received any note where they've actually started those medicines and have agreed that yes, I think that this would be a good thing to be continuing on them and then I haven't gotten their final note where they say, I think I can stop seeing this person and transfer their care, so, um. (IV 8, L 140-152)</p> <p>There are some patients that I inherit that are on it and our first step is to get them off of it, but you ask them how they got on it and why are they using it and mostly it's their family doc started them on it and why are they using it? Well they think it's</p> |

1  
2  
3  
4  
5  
6  
7  
8  
9  
10  
11  
12  
13  
14  
15  
16  
17  
18  
19  
20  
21  
22  
23  
24  
25  
26  
27  
28  
29  
30  
31  
32  
33  
34  
35  
36  
37  
38  
39  
40  
41  
42  
43  
44  
45  
46  
47

|  |                                                                                                                                                                                                                                                                                                                                                                                                                                                                                                                                                                                                                                                                                                                                                                                                                                                                                                                                                                                                                                                                                                                                                                                                                                                                                                                                                                                                                                                                                                                                                                                                                                                                                                                                                                                                                                                                                                                                                                                                                       |
|--|-----------------------------------------------------------------------------------------------------------------------------------------------------------------------------------------------------------------------------------------------------------------------------------------------------------------------------------------------------------------------------------------------------------------------------------------------------------------------------------------------------------------------------------------------------------------------------------------------------------------------------------------------------------------------------------------------------------------------------------------------------------------------------------------------------------------------------------------------------------------------------------------------------------------------------------------------------------------------------------------------------------------------------------------------------------------------------------------------------------------------------------------------------------------------------------------------------------------------------------------------------------------------------------------------------------------------------------------------------------------------------------------------------------------------------------------------------------------------------------------------------------------------------------------------------------------------------------------------------------------------------------------------------------------------------------------------------------------------------------------------------------------------------------------------------------------------------------------------------------------------------------------------------------------------------------------------------------------------------------------------------------------------|
|  | <p>the sleep but mostly they really don't know. It's for nerves or to sleep, so you say, well, you know, I think there's other things we can do and let's try these other things and they don't seem to miss it. (IV 3, L 117-124)</p> <p>Um, I think I would probably leave them on them. I don't think I would change them off of that. I don't, yeah, usually most of my patients are coming, you know, from a psychiatrist. If they were coming from sort of another family physician and they were on quetiapine, I would probably leave them on it but I would usually sort of look to see who initiated it and if there was sort of say like a reasonable indication for it. (IV 7, L 531-535)</p> <p>I do tend to just continue. I think the only time that I would necessarily reevaluate, I reevaluate their mood on a regular basis but I think the only time that I would reevaluate their medications is if their mood was not as good as we would like it to be. (IV 2, L 396-398)</p> <p>I've had patients who have been on it a long time and they are counseled by me on the risks of staying on it long-term and they say, doctor, I want it, it helps me sleep and I feel better and my mood is better and I, they accept the risk and they want to stay on it. (IV 2, L 133-136)</p> <p>I've renewed it in patients who have had it for awhile and they're stable on their medications, I certainly renew it, though when I do, I ask why they're taking the medication and often times they don't really know why they're on it, and if somebody is taking it purely as a sleep aid where they don't have sort of, again, an axis I disorder, then I question whether we should continue it or not. (IV 6, L 124-127)</p> <p>Also depends on the patient's comfort because when they suffer so significantly from mood disorders, there is a significant reluctance to playing with psychotropic medications when they feel like they've made some progress and stabilize. (IV 5, L 250-252)</p> |
|--|-----------------------------------------------------------------------------------------------------------------------------------------------------------------------------------------------------------------------------------------------------------------------------------------------------------------------------------------------------------------------------------------------------------------------------------------------------------------------------------------------------------------------------------------------------------------------------------------------------------------------------------------------------------------------------------------------------------------------------------------------------------------------------------------------------------------------------------------------------------------------------------------------------------------------------------------------------------------------------------------------------------------------------------------------------------------------------------------------------------------------------------------------------------------------------------------------------------------------------------------------------------------------------------------------------------------------------------------------------------------------------------------------------------------------------------------------------------------------------------------------------------------------------------------------------------------------------------------------------------------------------------------------------------------------------------------------------------------------------------------------------------------------------------------------------------------------------------------------------------------------------------------------------------------------------------------------------------------------------------------------------------------------|
